# Supplementary material for: A new model predicts hepatocellular carcinoma in patients with HBV-related decompensated liver cirrhosis and long-term antiviral therapy: a prospective study
Source: PeerJ. 2023 Mar 24;11:e15014. doi: 10.7717/peerj.15014 (PMC10042153; doi:10.7717/peerj.15014)
Supplement: Supplemental Information 1 [file peerj-11-15014-s001.xlsx]

## Sheet: Sheet1
No.	date to follow-up	end of follow-up	months	gender	age	Diabetes	DCDCCCCC	HCC	ALBI	CAMD	PAGE_B	mPAGE_B	aMAP	Model_Age_DC_PLT_TBil	ALBI grade: <-2.60 (ALBI grade 1), more than -2.60 to -1.39 (ALBI grade 2),and more than-1.39(ALBI grade 3)	CAMD grade: <8 (grade 1), more than 8 to 13 (grade 2), and more than 13 (grade 3)	PAGE_B grade: <9 (grade 1), more than 10 to 17 (grade 2), and more than 18 (grade 3)	mPAGE_B grade: <8 (grade 1), more than 9 to 12 (grade 2), and more than 13 (grade 3)	aMAP grade: <50 (grade 1), more than 50 to 60 (grade 2), and more than 60 (grade 3)	Model_Age_DC_PLT_TBil	Model_Age_DC	MELD	MELDna	ALT	AST	ALP	GGT	TBIL	PLT	ALB	Cr	Na	INR	WBC	AFP
1	2018.5.28	2021.7.12	37	male	60	diabetes	CC	non-HCC	-1.54628	19	20	17	66.6742	0.09125	2	3	3	3	3	0.09125	0.13733	14	14	21	25	60	92	35.2	130	30.2	80.2	135.1	1.56	11.93	7.77
2	2018.8.24	2021.8.26	36	male	42	non-diabetes	CC	non-HCC	-2.64484	13	16	10	52.4745	0.0337	1	2	2	2	2	0.0337	0.06204	8	8	46	41	133	58	22.4	179	41.6	71.4	138.9	1.06	6.55	7.58
3	2015.4.20	2020.10.20	66	female	59	non-diabetes	CC	non-HCC	-2.37453	14	6	10	51.051	0.06829	2	3	1	2	2	0.06829	0.13166	7	7	23	29	76	22	10.3	226	35.8	60.7	137.3	1.04	3.79	1.61
4	2018.12.5	2021.7.30	32	male	68	non-diabetes	CC	non-HCC	-2.91062	18	23	16	71.5159	0.16473	1	3	3	3	3	0.16473	0.19043	12	12	13	28	65	62	57.4	41	47.9	89.9	137.4	1.08	3.1	2.31
5	2014.9.29	2021.6.15	80	male	37	non-diabetes	CC	non-HCC	-2.78103	12	14	9	53.1151	0.04097	1	2	2	2	2	0.04097	0.04927	9	9	31	24	75	50	19.3	133	42.7	83.6	142.7	1.16	5.17	3.72
6	2018.11.18	2021.3.30	28	female	57	diabetes	CC	non-HCC	-2.15163	15	12	13	58.6135	0.13521	2	3	2	3	2	0.13521	0.12089	8	8	65	57	120	63	14.8	113	34.4	50.2	141.6	1.18	3	13.84
7	2017.9.25	2021.9.16	48	male	54	diabetes	CC	non-HCC	-2.55262	17	21	14	65.9089	0.15442	2	3	3	3	3	0.15442	0.10618	8	8	24	25	75	16	22.3	57	40.5	77.7	144.7	1.04	2.02	1.54
8	2020.6.2	2021.8.9	14	male	51	non-diabetes	CC	non-HCC	-2.39428	16	21	15	63.3767	0.12764	2	3	3	3	3	0.12764	0.09307	7	7	275	177	92	137.5	15	84	37.3	90	144.2	1.07	5.07	34.66
9	2019.6.22	2021.7.6	24	male	50	non-diabetes	CC	non-HCC	-2.48652	16	21	15	62.8739	0.11519	2	3	3	3	3	0.11519	0.08903	10	10	20	22	96	36	19.1	81	39.2	94.7	140.3	1.25	4	10.05
10	2018.12.18	2021.7.13	32	female	53	non-diabetes	CC	non-HCC	-2.9439	14	12	11	54.2785	0.07905	1	3	2	2	2	0.07905	0.10164	9	9	13	16	86	17	31.8	115	46.3	70	140.6	0.98	4.53	2.11
11	2019.1.14	2021.7.20	31	female	45	non-diabetes	CC	non-HCC	-3.0809	11	10	8	46.5211	0.05465	1	2	2	1	1	0.05465	0.07112	6	6	16	17	92	12	8.1	175	43.3	70	136.2	0.91	6.07	2.48
12	2018.10.15	2021.4.19	30	female	66	diabetes	CC	non-HCC	-2.66521	17	17	14	64.7982	0.22461	1	3	2	3	3	0.22461	0.17583	12	12	21	27	96	34	31.6	51	43	73.6	141.8	1.32	3.65	4.06
13	2014.9.23	2020.6.16	69	male	41	non-diabetes	CC	non-HCC	-3.14023	13	16	11	52.8957	0.05758	1	2	2	2	2	0.05758	0.05926	9	11	65	35	87	55	8.6	143	44.2	94.3	133.5	1.22	7.39	2.83
14	2019.8.14	2021.5.3	21	male	49	non-diabetes	CC	non-HCC	-2.67233	13	19	12	62.1346	0.09932	1	2	3	2	3	0.09932	0.08515	10	10	289	163	97	162	25.8	77	42.4	93.3	141.8	1.11	4.76	88.7
15	2015.5.21	2021.9.22	76	female	51	diabetes	CC	non-HCC	-2.86909	15	15	12	57.2975	0.13248	1	3	2	2	2	0.13248	0.09307	9	9	16	38	81	142	21.5	62	44.1	88.9	140.1	1.14	2.8	6.86
16	2015.3.19	2020.11.3	68	female	52	non-diabetes	CC	non-HCC	-2.59186	14	12	12	55.761	0.12172	2	3	2	2	2	0.12172	0.09727	8	8	123	81	145	50	12.1	104	38.9	68.3	138.6	1.12	5.76	4.81
17	2018.11.19	2021.6.19	31	male	43	non-diabetes	CC	non-HCC	-2.74901	13	19	12	59.5835	0.08078	1	2	3	2	2	0.08078	0.06494	10	10	100	52	124	97	22.9	75	42.9	62.9	141.2	1.26	4.87	22.02
18	2018.8.10	2021.8.14	36	female	31	non-diabetes	CC	non-HCC	-2.82676	10	2	5	38.0038	0.01585	1	2	1	1	1	0.01585	0.03723	6	6	189	89	60	23	12.6	229	41.8	80.2	141.8	0.91	5.33	3.57
19	2016.11.8	2021.4.27	54	female	53	non-diabetes	CC	non-HCC	-3.59814	14	15	12	56.1469	0.15433	1	3	2	2	2	0.15433	0.10164	8	8	18	21	65	21	20.4	56	52.5	62.5	141.4	1.06	2.25	2.63
20	2019.8.5	2021.2.25	19	male	49	diabetes	CC	non-HCC	-2.60384	14	16	11	60.5969	0.08954	1	3	2	2	3	0.08954	0.08515	8	8	160	97	107	74	21	103	40.9	77	138.2	1.03	6.03	4.73
21	2015.10.20	2021.7.8	67	male	40	non-diabetes	CC	non-HCC	-2.65782	13	16	11	53.2447	0.04815	1	2	2	2	2	0.04815	0.0566	8	8	30	22	104	69	10.2	155	39.1	96.8	142.7	1.03	6.25	2.1
22	2013.10.23	2021.4.25	90	male	57	diabetes	CC	non-HCC	-3.12736	17	18	13	59.0309	0.10893	1	3	3	3	2	0.10893	0.12089	12	12	38	51	96	59	12.1	149	45.2	139.9	141.8	1.07	7.51	1.79
23	2013.12.25	2021.8.28	81	male	52	diabetes	CC	non-HCC	-3.35122	17	12	9	47.4706	0.02727	1	3	2	2	1	0.02727	0.09727	7	7	53	32	69	60	17.1	279	49	96.2	139.6	0.99	7.36	2.18
24	2018.8.27	2021.6.24	34	female	35	non-diabetes	CC	non-HCC	-3.14749	10	8	7	45.9662	0.04417	1	2	1	1	1	0.04417	0.0449	9	9	68	32	65	49	16.1	120	46.4	65.5	141	1.27	3.95	7.51
25	2018.11.19	2020.8.6	21	female	57	non-diabetes	CC	non-HCC	-3.35305	14	15	12	56.5371	0.14827	1	3	2	2	2	0.14827	0.12089	7	7	22	25	85	18	20.3	86	49.6	43.1	143.6	0.98	3.55	2.55
26	2018.6.29	2022.1.28	43	female	47	non-diabetes	CC	non-HCC	-2.42668	11	10	10	51.4908	0.06791	2	2	2	2	2	0.06791	0.07785	6	6	19	19	42	16	13.8	145	37.4	81.7	141	0.89	5.7	2.33
27	2018.10.11	2020.10.25	24	male	42	non-diabetes	CC	non-HCC	-3.07302	13	10	7	44.7864	0.01988	1	2	2	1	1	0.01988	0.06204	6	6	55	26	83	41	11.2	272	44.3	64	136	0.98	8.06	2.41
28	2017.7.3	2021.5.24	47	male	34	non-diabetes	CC	non-HCC	-2.69435	12	14	9	54.1416	0.04353	1	2	2	2	2	0.04353	0.04285	9	9	37	25	102	61	20.6	104	41.9	76.2	138.5	1.13	4.94	6.11
29	2018.4.30	2019.7.26	15	female	38	non-diabetes	CC	non-HCC	-1.8462	10	8	9	51.7524	0.03885	2	2	1	2	2	0.03885	0.05161	11	11	192	140	104	56	31	115	33.3	62.1	142.6	1.23	7.18	4.98
30	2018.4.25	2021.4.19	36	female	50	non-diabetes	CC	non-HCC	-2.97482	14	12	11	53.9749	0.09795	1	3	2	2	2	0.09795	0.08903	7	7	52	44	124	82	20	100	45.1	79	141.1	0.93	3.5	12.7
31	2016.9.28	2021.2.22	53	male	46	diabetes	CC	non-HCC	-2.83353	14	16	11	55.7881	0.06959	1	3	2	2	2	0.06959	0.07442	7	7	10	15	90	11	10.3	145	41.2	78.9	141.2	1.08	7.63	0.43
32	2018.7.1	2021.7.28	37	male	49	non-diabetes	CC	non-HCC	-2.64712	13	16	11	57.748	0.06876	1	2	2	2	2	0.06876	0.08515	9	9	262	147	90	78	18.6	143	41	97.2	141.5	1.08	5.72	3.86
33	2018.11.26	2021.8.21	33	male	43	non-diabetes	CC	non-HCC	-2.9073	13	19	12	61.4387	0.09461	1	2	3	2	3	0.09461	0.06494	10	10	154	140	84	79	28.5	40	45.5	89.9	141	1.12	3.04	6.2
34	2019.2.20	2021.8.16	30	female	41	non-diabetes	CC	non-HCC	-2.11008	11	10	10	49.2022	0.04122	2	2	2	2	1	0.04122	0.05926	7	7	204	103	60	127	18.7	158	34.7	76.3	137.4	1.02	2.82	33.34
35	2015.6.29	2021.6.29	72	male	49	non-diabetes	CC	non-HCC	-2.83032	13	16	11	58.7099	0.08006	1	2	2	2	2	0.08006	0.08515	8	8	27	23	63	29	20	120	43.4	77.7	138	1.07	5.26	6.31
36	2018.9.25	2021.4.23	31	male	66	non-diabetes	CC	non-HCC	-2.27934	18	23	17	71.8749	0.25723	2	3	3	3	3	0.25723	0.17583	12	12	409	276	91	112	22.4	54	37.3	106	139.6	1.23	2.11	433.42
37	2019.10.24	2021.7.20	20	female	49	non-diabetes	CC	non-HCC	-2.7566	11	4	7	45.6793	0.02732	1	2	1	1	1	0.02732	0.08515	9	9	10	15	54	9	30	227	43.9	64.3	140.5	1.02	8.85	1.48
38	2018.10.18	2021.10.9	36	male	47	non-diabetes	CC	non-HCC	-3.22802	13	16	11	57.4174	0.09017	1	2	2	2	2	0.09017	0.07785	6	6	35	32	123	68	14.1	108	46.9	76.6	139.8	0.99	2.52	5.71
39	2018.12.12	2021.8.4	32	male	31	non-diabetes	CC	non-HCC	-2.29952	12	14	10	52.2426	0.03056	2	2	2	2	2	0.03056	0.03723	10	10	238	145	103	180	19.1	133	37	82.4	135.8	1.35	5.42	44.05
40	2018.11.5	2020.11.12	24	male	47	diabetes	CC	non-HCC	-2.60258	14	19	12	63.8508	0.11864	1	3	3	2	3	0.11864	0.07785	9	9	69	40	198	481	25.2	43	41.5	84.3	139.8	1.14	3.07
41	2015.7.10	2021.6.3	71	male	41	non-diabetes	CC	non-HCC	-2.72704	13	16	10	52.8167	0.04478	1	2	2	2	2	0.04478	0.05926	9	9	34	37	134	46	12.5	164	40.6	91.8	140	1.26	4.32	1.92
42	2018.7.10	2019.4.8	9	male	61	non-diabetes	CC	non-HCC	-2.53196	18	23	17	67.6687	0.20554	2	3	3	3	3	0.20554	0.14322	9	9	114	262	149	97	16.3	74	39.2	73.6	142.7	1.21	4.3	55.08
43	2017.5.26	2021.3.29	46	female	52	non-diabetes	CC	non-HCC	-2.91724	14	12	10	49.1518	0.06472	1	3	2	1	1	0.06472	0.09727	6	6	34	27	60	13	12	186	42.7	82.8	141.6	0.94	5.9	1.72
44	2017.9.1	2021.6.2	45	male	50	diabetes	CC	non-HCC	-2.96452	17	18	13	56.9874	0.07786	1	3	3	3	2	0.07786	0.08903	7	7	68	32	61	20	14.1	145	43.8	74	140.8	1.01	3.47	6.95
45	2018.12.28	2020.10.19	22	male	44	non-diabetes	CC	non-HCC	-3.03052	13	10	9	50.4086	0.03884	1	2	2	2	2	0.03884	0.06797	9	9	21	28	139	104	11.2	203	43.8	109.9	141.7	1.08	8.89	9.46
46	2015.11.24	2021.9.15	70	female	58	non-diabetes	CC	non-HCC	-2.85629	14	6	7	46.8448	0.0505	1	3	1	1	1	0.0505	0.12618	6	6	102	55	144	90	9.8	259	41.3	50	143.2	0.98	5.99
47	2015.1.3	2021.7.8	78	male	43	non-diabetes	CC	non-HCC	-2.88382	13	19	12	58.2652	0.07073	1	2	3	2	2	0.07073	0.06494	8	8	51	21	99	75	24.4	88	44.7	71.5	140.1	1	4.71	1.88
48	2015.10.12	2021.2.24	64	male	49	non-diabetes	CC	non-HCC	-2.2209	13	16	13	60.0133	0.09276	2	2	2	3	3	0.09276	0.08515	7	7	39	28	97	38	8.9	130	33.5	70.6	143.8	1.07	4.1	2.1
49	2018.8.3	2020.8.31	24	male	50	non-diabetes	CC	non-HCC	-2.67756	16	18	13	58.3261	0.06868	1	3	3	3	2	0.06868	0.08903	8	8	67	46	82	81	22.5	139	42	86.1	142.1	1.08	5.36	4.92
50	2018.9.18	2021.7.6	34	male	42	non-diabetes	CC	non-HCC	-2.42415	13	16	10	52.0407	0.02336	2	2	2	2	2	0.02336	0.06204	9	9	1386	604	165	434	32.9	196	40.3	72.1	142.9	0.93	6.66	19.1
51	2015.1.4	2021.9.28	80	male	49	non-diabetes	CC	non-HCC	-3.02052	13	19	12	59.7167	0.09798	1	2	3	2	2	0.09798	0.08515	7	7	21	17	108	25	19.2	96	45.5	90	142.4	0.99	4.31	5.13
52	2013.9.27	2021.5.5	91	male	58	non-diabetes	CC	non-HCC	-2.25956	16	21	15	70.6527	0.22088	2	3	3	3	3	0.22088	0.12618	10	10	40	27	40	43	24	25	37.3	72.9	140.8	1.22	2.94	3.69
53	2017.12.4	2021.4.9	41	male	53	non-diabetes	CC	non-HCC	-2.91612	16	21	14	62.1548	0.11789	1	3	3	3	3	0.11789	0.10164	10	10	52	48	90	57	21.8	89	44.7	97.6	140.3	1.15	3.53	18.05
54	2018.7.17	2021.9.23	38	male	67	non-diabetes	CC	non-HCC	-2.04517	18	14	13	56.0482	0.04498	2	3	2	3	2	0.04498	0.18302	7	7	30	22	139	52	18.5	305	33.9	78.7	142.4	1.03	7.03	2.55
55	2019.7.29	2021.8.5	24	female	47	non-diabetes	CC	non-HCC	-2.74023	11	10	9	48.2376	0.05685	1	2	2	2	1	0.05685	0.07785	6	6	13	18	32	17	9.7	178	39.9	59.4	142.6	0.96	5.06	1.59
56	2018.10.23	2021.8.1	33	male	46	non-diabetes	CC	non-HCC	-3.00343	13	16	11	57.2671	0.07508	1	2	2	2	2	0.07508	0.07442	8	8	103	41	103	41	18.1	115	45.1	95.4	142.3	1.05	4.11	6.83
57	2012.8.28	2021.1.6	100	male	48	non-diabetes	CC	non-HCC	-2.23986	13	16	12	61.1027	0.05856	2	2	2	2	3	0.05856	0.08142	10	10	870	362	103	523	37.8	107	38.6	84.9	139.3	1.02	7.32	9.84
58	2019.6.9	2021.7.15	25	female	50	non-diabetes	CC	non-HCC	-2.61921	14	12	11	54.7243	0.10194	1	3	2	2	2	0.10194	0.08903	6	6	30	25	70	47	15.7	106	40.1	72.1	143.4	0.95	3.61	1.72
59	2018.9.25	2021.6.28	33	female	58	non-diabetes	CC	non-HCC	-2.37156	14	15	13	61.6226	0.17383	2	3	2	3	3	0.17383	0.12618	9	9	33	46	165	73	22.5	64	38.4	53.6	141.4	1.15	2.77	39.68
60	2013.5.28	2021.4.12	95	male	50	non-diabetes	CC	non-HCC	-1.8784	16	18	14	62.6836	0.043	2	3	3	3	3	0.043	0.08903	13	13	382	147	123	176	54.8	113	35.6	91.9	139.4	1.16	3.91	34.62
61	2018.8.23	2021.2.18	30	male	52	non-diabetes	CC	non-HCC	-2.85332	16	21	14	61.411	0.10272	1	3	3	3	3	0.10272	0.09727	8	8	65	36	119	106	23.4	97	44.2	68.4	140.4	1.05	6.43	90.67
62	2018.11.13	2021.3.30	29	male	40	non-diabetes	CC	non-HCC	-3.28393	13	16	11	54.5275	0.06049	1	2	2	2	2	0.06049	0.0566	8	8	53	37	71	65	18.1	106	48.4	65.7	140.6	1.16	3.37	4.81
63	2018.8.10	2021.10.16	38	male	33	non-diabetes	CC	non-HCC	-2.95046	12	17	10	53.4447	0.04133	1	2	2	2	2	0.04133	0.04089	9	9	50	29	60	26	23.8	96	45.4	92	142.6	1.05	3.91	2.04
64	2018.8.29	2021.7.17	35	male	53	non-diabetes	CC	non-HCC	-2.81838	16	18	12	57.9362	0.08002	1	3	3	2	2	0.08002	0.10164	7	7	32	25	72	28	15.5	156	42.4	71.4	144.6	1.03	4.43	5.68
65	2018.9.14	2021.4.29	32	female	60	non-diabetes	CC	non-HCC	-2.19856	16	14	14	58.461	0.10968	2	3	2	3	2	0.10968	0.13733	10	10	17	20	102	37	25.6	131	36.8	65.5	142.3	1.17	3.33	2.08
66	2014.5.5	2021.8.9	87	male	60	diabetes	CC	non-HCC	-2.39368	19	20	16	65.3421	0.12537	2	3	3	3	3	0.12537	0.13733	10	10	21	33	161	69	27.2	109	39.3	91.3	141.6	1.12	5.81	3.36
67	2018.11.6	2021.3.18	28	male	67	diabetes	CC	non-HCC	-2.72304	19	20	14	62.85	0.13459	1	3	3	3	3	0.13459	0.18302	7	7	21	21	84	22	15.6	172	41.3	88	140.1	1.08	6.5	4.19
68	2019.6.11	2021.8.20	26	male	49	non-diabetes	CC	non-HCC	-2.8118	13	16	11	59.3117	0.07132	1	2	2	2	2	0.07132	0.08515	9	9	67	45	72	59	28.7	112	44.4	72.8	137.4	1.04	3.94	51.8
69	2015.11.11	2019.12.17	49	male	61	non-diabetes	CC	non-HCC	-3.24948	18	20	15	61.9516	0.15026	1	3	3	3	3	0.15026	0.14322	6	6	50	31	76	59	14.3	124	47.2	70.6	138.8	0.97	4.59	1.74
70	2019.11.23	2021.5.24	18	male	24	non-diabetes	CC	non-HCC	-2.18107	12	6	4	45.0446	0.00371	2	2	1	1	1	0.00371	0.02675	19	19	721	346	112	138	72.4	203	40.1	137.9	139.9	1.27	5.34	656.43
71	2013.2.6	2021.6.23	100	male	37	diabetes	CC	non-HCC	-3.64444	13	17	10	53.6267	0.07255	1	2	2	2	2	0.07255	0.04927	7	7	78	51	92	110	10.8	84	50.9	91.3	143.3	1	7.16	1.08
72	2018.9.3	2021.1.5	28	female	52	non-diabetes	CC	non-HCC	-3.09424	14	15	12	54.4669	0.12463	1	3	2	2	2	0.12463	0.09727	7	7	19	24	83	16	12.8	99	45	63.2	143.3	1.07	4.75	2.86
73	2018.9.21	2021.9.23	36	male	49	non-diabetes	CC	non-HCC	-2.95012	13	19	12	63.0599	0.13162	1	2	3	2	3	0.13162	0.08515	9	9	31	19	74	57	21.8	50	45.1	83.9	143.2	1.2	3.15	1.92
74	2018.12.29	2021.8.31	32	male	35	non-diabetes	CC	non-HCC	-2.49052	12	14	8	49.7261	0.02086	2	2	2	1	1	0.02086	0.0449	10	10	138	80	97	58	26.1	185	40.3	87.3	141.1	1.16	6.26	31.49
75	2018.9.18	2021.7.30	34	male	46	diabetes	CC	non-HCC	-2.86713	14	19	12	58.9288	0.06648	1	3	3	2	2	0.06648	0.07442	9	9	72	50	105	188	30.9	97	45.3	83.9	140.6	1.02	4.26	10.1
76	2018.8.27	2021.7.8	34	male	46	diabetes	CC	non-HCC	-2.76665	14	16	11	57.4273	0.06767	1	3	2	2	2	0.06767	0.07442	7	7	44	26	91	114	19.7	124	42.6	85.4	137.8	0.98	6.45	97.92
77	2019.6.4	2021.7.15	25	male	33	non-diabetes	CC	non-HCC	-2.77393	12	14	9	50.6331	0.03099	1	2	2	2	2	0.03099	0.04089	9	9	140	33	95	82	18.1	146	42.4	105.3	144.8	1.08	3.6	6.72
78	2018.12.7	2021.5.6	29	female	57	non-diabetes	CC	non-HCC	-3.21711	14	12	10	49.396	0.07263	1	3	2	2	1	0.07263	0.12089	7	7	9	14	61	11	13.4	198	46.6	75.7	142.5	1.06	6.48	1.64
79	2018.8.21	2021.10.13	38	male	67	non-diabetes	CC	non-HCC	-1.54329	18	23	18	72.9128	0.13089	2	3	3	3	3	0.13089	0.18302	13	13	490	410	149	276	52.3	80	31.5	90.5	140.6	1.21	2.56	100.91
80	2018.9.26	2021.9.24	36	male	50	non-diabetes	CC	non-HCC	-2.91051	16	21	14	60.7512	0.09827	1	3	3	3	3	0.09827	0.08903	8	8	33	31	57	29	22.9	92	44.8	83.2	139.7	1.05	3.95	4.04
81	2018.5.22	2021.9.4	39	female	53	non-diabetes	CC	non-HCC	-2.54027	14	12	10	52.5435	0.06883	2	3	2	2	2	0.06883	0.10164	7	7	45	53	116	43	21.3	160	40.2	62.5	143.1	0.94	5.18	4.67
82	2013.4.8	2021.8.9	100	male	60	non-diabetes	CC	non-HCC	-3.07281	18	20	15	63.2705	0.18446	1	3	3	3	3	0.18446	0.13733	10	10	16	20	58	17	7.4	107	42.9	99.8	139.8	1.23	2.58	3.82
83	2018.6.16	2021.9.4	39	female	55	diabetes	CC	non-HCC	-2.25566	15	15	13	61.0513	0.1896	2	3	2	3	3	0.1896	0.1109	6	6	54	61	157	40	12.3	60	35	74.3	139.6	0.94	2.52	10.68
84	2013.10.11	2021.4.8	89	male	64	non-diabetes	CC	non-HCC	-2.77854	18	20	15	65.0393	0.16275	1	3	3	3	3	0.16275	0.16214	7	7	13	19	79	21	18.9	119	42.6	75.8	138.7	0.99	5.33	3.44
85	2017.7.13	2021.7.12	48	male	49	diabetes	CC	non-HCC	-3.0816	14	19	12	61.2785	0.10965	1	3	3	2	3	0.10965	0.08515	9	9	350	222	98	73	23.5	70	46.9	94.6	143.2	1.03	3.68	5.17
86	2018.5.15	2020.3.7	22	male	54	non-diabetes	CC	HCC	-2.9515	16	21	14	65.0865	0.14951	1	3	3	3	3	0.14951	0.10618	10	10	18	36	91	242	26.7	50	45.8	106.2	141.1	1	2.53	6.16
87	2018.9.14	2021.5.31	33	male	59	diabetes	CC	HCC	-3.36202	17	18	13	62.0598	0.14427	1	3	3	3	3	0.14427	0.13166	7	7	48	34	74	60	19.1	105	49.5	76.5	138.3	1.02	3.29	8.32
88	2013.3.20	2016.01	33	male	45	diabetes	CC	HCC	-3.27872	14	16	11	55.56	0.08432	1	3	2	2	2	0.08432	0.07112	6	6	27	19	69	28	7.8	121	45.5	71.9	139.5	0.93	6.17	0.24
89	2014.9.22	2019.3.12	54	female	51	diabetes	CC	HCC	-2.91521	15	12	11	54.5748	0.13157	1	3	2	2	2	0.13157	0.09307	7	7	27	18	91	25	7.3	100	41	65.5	145.1	1.07	3.59	2.21
90	2011.12.22	2017.01.25	60	male	61	non-diabetes	CC	HCC	-2.08306	18	23	18	70.4139	0.22339	2	3	3	3	3	0.22339	0.14322	9	9	209	243	153	108	18.8	55	34.4	65.7	141.1	1.25	6.04	8.9
91	2015.4.6	2018.11.22	43	male	45	non-diabetes	CC	HCC	-2.70011	13	19	12	60.284	0.09197	1	2	3	2	3	0.09197	0.07112	9	9	51	43	74	43	19.6	79	41.8	69	139.7	1.16	3.93	4.19
92	2012.11.29	2016.5	41	male	70	non-diabetes	CC	HCC	-2.63888	18	22	17	67.3212	0.21052	1	3	3	3	3	0.21052	0.20593	9	10.908	117	103	83	96	15.1	128	40.2	108.4	133.8	1.07	6.46	132.49
93	2014.11.6	2017.4.10	29	female	64	diabetes	CC	HCC	-2.8429	17	14	13	59.4814	0.18082	1	3	2	3	2	0.18082	0.16214	8	8	16	39	106	93	17	109	43	72.2	142.3	1.14	6.15	58.15
94	2014.3.4	2017.3.31	36	male	51	non-diabetes	CC	HCC	-2.47156	16	18	13	58.3186	0.07912	2	3	3	2	2	0.07912	0.09307	8	8	273	123	91	87	11.8	155	37.4	78.4	139.5	1.2	3.9	3.4
95	2019.10.12	2021.9.13	23	female	41	non-diabetes	DC	non-HCC	-1.73375	11	13	12	56.7217	0.16049	2	2	2	2	2	0.16049	0.16008	12	12	45	132	119	47	36.2	65	32.5	66.4	140.7	1.33	4	30.2
96	2018.6.7	2021.3.23	34	female	54	non-diabetes	DC	non-HCC	-1.80296	14	12	13	56.3614	0.13272	2	3	2	3	2	0.13272	0.26439	12	12	22	29	66	19	45.7	145	34.1	73.6	137.5	1.22	5.25	2.75
97	2013.8.13	2020.6.15	82	female	59	non-diabetes	DC	non-HCC	-2.62402	14	12	12	58.771	0.38768	1	3	2	2	2	0.38768	0.31447	7	7	27	27	62	34	10.5	100	38.8	52.2	144.5	1.1	2.49	3.83
98	2018.10.1	2021.4.7	30	male	46	diabetes	DC	non-HCC	-1.67784	14	19	14	65.0957	0.2309	2	3	3	3	3	0.2309	0.19566	11	11	45	36	162	63	28.2	63	31	84.1	137.5	1.29	1.97	11.48
99	2014.8.21	2019.5.3	56	female	37	non-diabetes	DC	non-HCC	-1.32798	10	11	11	56.0093	0.21508	3	2	2	2	2	0.21508	0.13554	7	7	44	51	89	43	8.4	71	22.8	67.6	140.4	1.08	5.36	52.19
100	2016.7.26	2019.8.26	37	female	47	non-diabetes	DC	non-HCC	-2.48926	11	13	10	59.6151	0.25253	2	2	2	2	2	0.25253	0.20345	15	15	15	28	66	25	40.9	22	41.8	62.1	142.2	1.66	1.45	2.2
101	2018.12.10	2020.11.12	23	male	57	diabetes	DC	non-HCC	-1.5554	17	21	16	68.1341	0.19435	2	3	3	3	3	0.19435	0.29382	15	15	94	84	103	110	53.2	90	31.7	102.5	142	1.28	4.47	22.12
102	2018.6.8	2020.6.29	24	male	48	diabetes	DC	non-HCC	-2.68308	14	19	12	60.4071	0.2285	1	3	3	2	3	0.2285	0.21147	9	9	26	40	122	48	20.8	96	41.8	67.7	141.4	1.21	6.62	9.87
103	2019.2.16	2021.9.5	31	female	65	diabetes	DC	non-HCC	-1.90585	17	17	16	64.3547	0.38661	2	3	2	3	3	0.38661	0.38071	10	10	23	39	104	58	29.2	88	33.8	76.3	140.4	1.1	2.79	8.2
104	2019.9.24	2020.12.29	15	female	80	diabetes	DC	non-HCC	-1.42708	17	19	19	74.5769	0.56451	2	3	3	3	3	0.56451	0.56104	16	16	22	29	86	27	46	50	29.7	101.8	138.9	1.52	5.04	4.13
105	2016.10.18	2021.6.16	56	female	60	diabetes	DC	non-HCC	-1.70828	17	14	14	56.466	0.19763	2	3	2	3	2	0.19763	0.32508	9	9	42	64	240	36	23.2	184	30.7	53.3	141.3	1.13	4.41	13.98
106	2018.6.1	2020.7.16	25	male	79	non-diabetes	DC	non-HCC	-1.32589	18	25	21	81.6762	0.67277	3	3	3	3	3	0.67277	0.54899	11	11	22	36	67	69	29.4	33	27	89.1	140.7	1.21	2.92	19.66
107	2011.10.8	2017.9.2	71	male	67	non-diabetes	DC	non-HCC	-2.44426	18	23	17	72.4222	0.59466	2	3	3	3	3	0.59466	0.40397	11	11	41	59	76	25	12.6	44	37.3	102.1	141.5	1.33	1.78	1.12
108	2015.10.2	2021.7.29	70	male	57	diabetes	DC	non-HCC	-1.75961	17	21	16	70.111	0.26468	2	3	3	3	3	0.26468	0.29382	13	13	25	30	79	26	50.1	51	33.9	76.2	139.4	1.3	2.53	2.02
109	2017.1.10	2021.8.17	55	male	56	non-diabetes	DC	non-HCC	-2.84852	16	21	14	68.2648	0.34849	1	3	3	3	3	0.34849	0.2838	12	12	79	44	86	105	41.8	20	46.1	98.5	139.6	1.11	7.66	5.14
110	2013.9.19	2019.11.8	74	female	54	non-diabetes	DC	non-HCC	-2.5136	14	15	12	59.4683	0.17318	2	3	2	2	2	0.17318	0.26439	21	21	147	177	121	28	62.2	65	43.5	60.1	144.6	2.34	2.88	110.59
111	2013.6.25	2021.3.24	93	female	58	non-diabetes	DC	non-HCC	-1.82907	14	15	14	65.0105	0.37341	2	3	2	3	3	0.37341	0.30405	12	12	20	37	99	24	33.9	40	33.4	56.4	143.2	1.33	1.72	4.05
112	2013.4.24	2021.5.27	97	female	45	non-diabetes	DC	non-HCC	-1.18954	11	13	13	63.5005	0.20838	3	2	2	3	3	0.20838	0.18809	16	16	14	16	164	63	50.2	15	27.2	51.2	138	1.58	2.17	0.98
113	2014.4.19	2019.8.5	64	male	45	diabetes	DC	non-HCC	-2.85616	14	19	12	61.4018	0.14038	1	3	3	2	3	0.14038	0.18809	12	12	1516	1166	98	162	56.4	55	47.2	56.3	139.7	1.13	3.79	99.8
114	2013.1.19	2019.9.5	80	male	52	diabetes	DC	non-HCC	-2.15253	17	21	15	68.2247	0.26322	2	3	3	3	3	0.26322	0.24585	12	12	29	38	60	52	46.9	30	38.3	85	139.6	1.22	2.78	20
115	2018.11.13	2021.8.2	33	male	33	non-diabetes	DC	non-HCC	-2.26198	12	14	9	54.6666	0.05577	2	2	2	2	2	0.05577	0.11426	15	15	333	245	176	209	53	111	40	80.5	138.5	1.53	4.05	914.49
116	2013.3.25	2019.5.5	73	male	48	non-diabetes	DC	non-HCC	-2.05297	13	19	13	66.2463	0.23226	2	2	3	3	3	0.23226	0.21147	14	14	18	28	57	33	41.3	40	36.7	83.7	139.7	1.47	2.66	4.28
117	2015.12.21	2019.1.27	38	male	70	diabetes	DC	non-HCC	-1.7026	19	25	20	74.6293	0.49326	2	3	3	3	3	0.49326	0.43966	12	12	16	22	93	20	30	65	31.5	95.4	142.6	1.31	3.8
118	2014.4.15	2019.1.4	57	male	50	diabetes	DC	non-HCC	-2.46693	17	18	13	60.2293	0.07327	2	3	3	3	3	0.07327	0.22821	12	12	958	767	128	81	75.4	121	43.6	81.6	141.7	1.04	3.67	53.91
119	2016.4.12	2021.6.22	62	male	42	non-diabetes	DC	non-HCC	-2.2259	13	16	12	57.9659	0.11103	2	2	2	2	2	0.11103	0.16675	13	13	371	828	121	139	37.4	118	38.4	71.2	141.6	1.41	6.53	8.71
120	2017.5.18	2021.5.11	48	female	48	non-diabetes	DC	non-HCC	-2.20829	11	13	11	60.1897	0.19675	2	2	2	2	3	0.19675	0.21147	14	14	44	62	122	21	53.5	33	39.4	72.5	139.3	1.31	3	14.08
121	2018.5.28	2021.5.12	36	male	65	non-diabetes	DC	non-HCC	-2.68884	18	14	11	54.1595	0.08523	1	3	2	2	2	0.08523	0.38071	10	10	35	31	74	114	38	290	43.9	85.4	139.8	1.02	6.24	3.6
122	2014.1.17	2019.6.26	65	male	42	non-diabetes	DC	non-HCC	-0.414683	13	19	15	68.1175	0.21739	3	2	3	3	3	0.21739	0.16675	15	15	42	73	93	23	25.5	55	15.8	119.7	140.8	1.39	7.89	5.25
123	2018.7.5	2020.8.4	25	female	70	diabetes	DC	non-HCC	-1.10569	17	19	19	71.4236	0.21111	3	3	3	3	3	0.21111	0.43966	21	21	67	58	216	80	93.2	52	28.3	59.6	136	2.02	5.2	287.16
124	2018.10.15	2020.4.27	18	male	62	diabetes	DC	non-HCC	-1.34458	19	23	19	74.0325	0.46391	3	3	3	3	3	0.46391	0.34685	14	14	48	62	180	162	25.2	43	26.7	111.2	142.9	1.4	3.38	32.64
125	2017.1.2	2021.9.3	56	female	34	non-diabetes	DC	non-HCC	-2.56302	10	11	9	51.9956	0.20459	2	2	2	2	2	0.20459	0.11929	7	7	10	15	38	12	11.2	53	38.3	68.1	140	1.05	1.34	7.3
126	2012.7.23	2019.9.23	86	female	66	non-diabetes	DC	non-HCC	-1.33288	16	17	17	68.0448	0.34578	3	3	2	3	3	0.34578	0.39228	13	13	27	54	100	32	47.5	67	28.7	71.2	144.4	1.32	3.44	21.43
127	2018.8.14	2021.5.14	33	male	41	non-diabetes	DC	non-HCC	-1.46774	13	16	14	59.8882	0.15381	2	2	2	3	2	0.15381	0.16008	10	10	29	34	79	40	17.4	120	26.9	96.5	139.4	1.25	12.61	4.98
128	2013.1.2	2021.5.8	100	male	47	non-diabetes	DC	non-HCC	-2.14812	13	10	12	54.4272	0.10702	2	2	2	2	2	0.10702	0.20345	8	8	40	39	102	37	17.9	204	35	93.6	141.8	1.07	9.6	0.97
129	2018.12.23	2020.12.27	24	male	66	non-diabetes	DC	non-HCC	-2.5276	18	23	17	71.2035	0.59796	2	3	3	3	3	0.59796	0.39228	23	25.544	69	54	193	79	6.6	52	36.1	425.2	133.4	1.17	1.86	11.58
130	2015.11.21	2021.5.13	66	male	80	non-diabetes	DC	non-HCC	-2.30294	18	25	19	74.9126	0.6615	2	3	3	3	3	0.6615	0.56104	9	9	10	18	112	13	11.4	92	35.3	97.5	141.2	1.19	2.66	1.91
131	2015.4.27	2021.9.16	77	male	60	non-diabetes	DC	non-HCC	-0.745123	18	23	19	74.5588	0.21834	3	3	3	3	3	0.21834	0.32508	20	20	46	55	127	46	68.1	52	23	93.1	139.5	1.95	7.2	6.5
132	2018.6.3	2021.7.31	38	female	76	non-diabetes	DC	non-HCC	-2.60323	16	19	16	65.8798	0.57399	1	3	3	3	3	0.57399	0.51255	8	8	9	18	58	22	16.6	98	40.1	68.4	141.9	1.18	4.01	1.2
133	2018.12.12	2021.7.25	31	male	49	diabetes	DC	non-HCC	-2.60364	14	19	12	61.6808	0.2535	1	3	3	2	3	0.2535	0.21973	8	8	122	64	151	248	20.4	87	40.8	69	141.3	1.1	3.77	247.35
134	2015.8.27	2021.4.23	68	male	49	diabetes	DC	non-HCC	-1.62217	14	19	14	68.0525	0.17895	2	3	3	3	3	0.17895	0.21973	14	14	43	50	144	75	58.4	40	32.8	71.3	144.9	1.35	1.49	3.46
135	2018.2.11	2021.4.30	39	male	47	diabetes	DC	non-HCC	-1.18614	14	19	15	67.303	0.12683	3	3	3	3	3	0.12683	0.20345	16	16	17	23	61	44	64.4	60	28	61.6	141.3	1.52	4.46	1.21
136	2018.12.27	2020.12.11	24	male	38	diabetes	DC	non-HCC	-1.73903	13	8	8	40.2523	0.01802	2	2	1	1	1	0.01802	0.14136	19	19	23	21	102	97	14.6	379	29.5	238.6	137.9	1.33	14.89	1.36
137	2014.9.27	2021.7.16	70	male	48	diabetes	DC	non-HCC	-1.27393	14	10	10	53.6121	0.05734	3	3	2	2	2	0.05734	0.21147	14	14	15	20	68	29	27.8	264	26.2	103.5	141.4	1.46	4.26	0.9
138	2012.2.17	2021.5.11	111	male	63	non-diabetes	DC	non-HCC	-2.35462	18	23	17	69.8022	0.45649	2	3	3	3	3	0.45649	0.35798	8	8	22	20	62	48	21.2	63	38	97.5	140.8	0.97	5.53	2.83
139	2016.2.24	2021.2.22	60	female	57	non-diabetes	DC	non-HCC	-2.59387	14	15	12	62.7281	0.32669	2	3	2	2	3	0.32669	0.29382	12	12	33	50	112	22	44.3	31	43.3	65.7	142.5	1.18	3.32	2.13
140	2018.11.21	2021.7.30	32	female	39	non-diabetes	DC	non-HCC	-2.21165	10	11	9	54.3562	0.16492	2	2	2	2	2	0.16492	0.14739	12	12	27	29	130	89	30.1	65	37.5	52.7	137.8	1.33	3.25	2.53
141	2017.11.1	2021.9.13	46	male	32	non-diabetes	DC	non-HCC	-2.02759	12	14	11	54.6835	0.09758	2	2	2	2	2	0.09758	0.10941	13	13	26	26	59	18	21.5	116	34.2	108.6	140.9	1.34	6.63	2.29
142	2017.8.9	2020.1.7	29	male	63	diabetes	DC	non-HCC	-1.38284	19	23	18	73.6374	0.19427	3	3	3	3	3	0.19427	0.35798	16	16	569	412	124	152	81.3	53	31.1	77.7	135.7	1.34	4.21	5.14
143	2018.6.13	2021.9.1	39	male	36	non-diabetes	DC	non-HCC	-1.66084	12	17	12	62.7136	0.18047	2	2	2	2	3	0.18047	0.12993	11	11	35	41	122	206	28.2	39	30.8	77.3	141.7	1.26	3.63
144	2016.9.16	2021.1.18	56	male	47	diabetes	DC	non-HCC	-2.67526	14	10	7	42.6938	0.03605	1	3	2	1	1	0.03605	0.20345	8	8	32	34	185	156	13.7	352	40.3	96.7	137.6	1.08	4.16	2.66
145	2014.7.14	2021.9.14	86	male	63	non-diabetes	DC	non-HCC	-1.6543	18	20	17	67.9481	0.21184	2	3	3	3	3	0.21184	0.35798	15	15	28	37	93	27	49.2	124	32.6	84.6	143.6	1.52	8.05	7.48
146	2018.6.18	2021.6.7	36	female	45	non-diabetes	DC	non-HCC	-1.64036	11	13	12	60.8167	0.2747	2	2	2	2	3	0.2747	0.18809	12	12	30	42	179	51	26.9	33	30.4	68.4	139.3	1.44	3.19	6.95
147	2013.7.17	2019.4.15	69	female	55	non-diabetes	DC	non-HCC	-0.969959	14	15	15	66.1775	0.37783	3	3	2	3	3	0.37783	0.27399	14	14	51	48	164	65	23.8	46	22.1	94.5	140.9	1.6	7.3	39.51
148	2013.11.10	2021.6.6	91	female	65	non-diabetes	DC	non-HCC	-1.70262	16	14	15	57.9062	0.3031	2	3	2	3	2	0.3031	0.38071	11	11	24	39	103	15	5.7	193	25.9	127.8	141.5	1.1	7.7	3.13
149	2017.11.21	2020.2.4	27	male	53	diabetes	DC	non-HCC	-1.2308	17	21	17	70.2723	0.32209	3	3	3	3	3	0.32209	0.25501	19	19	12	15	80	12	28.7	50	25.8	156.5	135.7	1.59	2.43	1.75
150	2018.6.21	2021.8.4	38	male	47	diabetes	DC	non-HCC	-1.23016	14	19	15	66.7537	0.20799	3	3	3	3	3	0.20799	0.20345	24	24	80	100	36	35	35.4	66	26.5	176.9	135.9	2.13	7.81	3.02
151	2018.9.4	2020.12.9	27	male	45	diabetes	DC	non-HCC	-1.30568	14	19	15	66.576	0.12695	3	3	3	3	3	0.12695	0.18809	16	17.908	29	39	149	67	62.4	53	29.3	81.7	133.8	1.53	4.64	5.99
152	2013.7.8	2019.7.8	72	male	44	non-diabetes	DC	non-HCC	-2.4774	13	19	12	64.6638	0.23655	2	2	3	2	3	0.23655	0.18076	16	16	26	32	62	53	39	19	41.5	100.2	144.4	1.61	2.14	5.41
153	2012.2.13	2020.5.30	99	male	46	non-diabetes	DC	non-HCC	-1.35613	13	19	15	65.6673	0.18242	3	2	3	3	3	0.18242	0.19566	13	13	32	68	120	48	38.9	70	28.3	79.9	141	1.34	4.88	1.45
154	2013.9.10	2021.5.20	92	male	49	non-diabetes	DC	non-HCC	-3.23582	13	16	10	54.6838	0.18631	1	2	2	2	2	0.18631	0.21973	7	7	26	22	104	28	10.2	160	45.9	67.2	136.6	1.06	7.18	3.13
155	2018.7.19	2021.8.2	36	female	59	diabetes	DC	non-HCC	-2.48131	15	15	12	60.9951	0.36201	2	3	2	2	3	0.36201	0.31447	10	10	19	31	141	37	25.4	74	40.1	62.5	141.2	1.22	3.2	5.75
156	2018.10.11	2021.2.26	29	male	56	non-diabetes	DC	non-HCC	-1.85887	16	21	16	71.5487	0.38864	2	3	3	3	3	0.38864	0.2838	13	13	31	23	96	51	34.4	19	33.8	87.6	139.4	1.48	1.06	13.95
157	2018.5.13	2021.9.8	40	male	43	non-diabetes	DC	non-HCC	-2.69766	13	16	11	56.4328	0.179	1	2	2	2	2	0.179	0.17364	8	8	40	35	81	72	12.3	124	40.2	85.6	140.9	1.17	3.67
158	2016.10.18	2021.3.9	53	male	60	non-diabetes	DC	non-HCC	-1.96598	18	20	17	65.0395	0.31455	2	3	3	3	3	0.31455	0.32508	8	8	13	20	92	12	14.3	134	32.1	66	141.7	1.14	3.63	1.99
159	2012.12.31	2019.2.15	74	female	44	non-diabetes	DC	non-HCC	-2.26686	11	13	11	56.5464	0.17269	2	2	2	2	2	0.17269	0.18076	13	13	18	31	98	22	41.1	60	39.2	59.9	141.1	1.38	4.51	15.36
160	2015.10.21	2021.3.1	65	male	60	diabetes	DC	non-HCC	-1.62854	19	23	18	69.7244	0.31506	2	3	3	3	3	0.31506	0.32508	13	13	21	48	135	25	34.5	81	31.1	72.7	143.8	1.44	6.78	2.58
161	2013.10.23	2021.3.18	89	female	62	non-diabetes	DC	non-HCC	-1.3008	16	17	17	65.4409	0.36408	3	3	2	3	3	0.36408	0.34685	10	10	36	49	91	69	28.5	83	26.6	56.5	141.2	1.12	3.64	2.13
162	2018.10.9	2021.4.30	31	female	65	diabetes	DC	non-HCC	-1.51771	17	17	17	68.1889	0.45217	2	3	2	3	3	0.45217	0.38071	12	12	61	73	161	51	31.6	50	29.5	73.6	139.7	1.33	4.01	4.74
163	2018.11.17	2020.3.5	16	male	61	non-diabetes	DC	non-HCC	-3.17346	18	23	16	64.0267	0.4126	1	3	3	3	3	0.4126	0.33588	7	7	35	40	95	100	11.6	97	45.6	60.1	141.4	1.08	4.42	2.28
164	2013.6.14	2017.9.22	51	male	61	non-diabetes	DC	non-HCC	-2.48611	18	23	17	69.2395	0.49519	2	3	3	3	3	0.49519	0.33588	10	10	39	27	116	65	13.4	53	38	110	138.2	1.18	3.14	11.32
165	2013.1.11	2019.8.8	79	male	55	diabetes	DC	non-HCC	-2.0172	17	21	16	68.8676	0.40094	2	3	3	3	3	0.40094	0.27399	15	15	13	15	30	20	19.8	45	33.8	139.7	136.2	1.36	1.81	0.73
166	2018.6.22	2020.10.26	28	male	69	non-diabetes	DC	non-HCC	-1.28515	18	23	19	73.8871	0.42727	3	3	3	3	3	0.42727	0.42767	16	16	9	17	53	14	30.1	90	26.6	106	142.2	1.65	11.15	1.22
167	2016.10.26	2021.6.15	56	male	64	non-diabetes	DC	non-HCC	-2.10974	18	14	12	56.38	0.09428	2	3	2	2	2	0.09428	0.36927	10	10	32	34	115	110	34.9	279	36.8	71	140.6	1.08	6.25	2.99
168	2014.2.7	2019.8.23	66	female	51	non-diabetes	DC	non-HCC	-3.21351	14	12	10	48.7306	0.16555	1	3	2	1	1	0.16555	0.23691	8	8	24	32	101	14	16.7	172	47.3	77.2	141.4	1.13	3.3	2.54
169	2018.5.2	2021.9.13	40	male	34	diabetes	DC	non-HCC	-1.43178	13	17	13	59.8019	0.09401	2	2	2	3	2	0.09401	0.11929	14	14	21	29	86	36	41.4	81	29.4	87.8	141	1.44	6.36	1.83
170	2013.12.23	2021.3.31	87	male	59	diabetes	DC	non-HCC	-2.96215	17	21	14	66.2706	0.41624	1	3	3	3	3	0.41624	0.31447	8	8	40	34	80	76	19.7	62	44.9	81.5	138	1.05	4.29	2.56
171	2017.4.28	2020.1.8	32	male	61	diabetes	DC	non-HCC	-1.76012	19	14	13	50.678	0.05566	2	3	2	3	2	0.05566	0.33588	13	13	38	52	76	44	21.8	362	31.1	117.6	141.9	1.26	9.08	4.11
172	2019.3.27	2021.10.15	31	male	49	diabetes	DC	non-HCC	-1.75408	14	16	13	60.9888	0.16098	2	3	2	3	3	0.16098	0.21973	9	9.954	23	23	213	84	26.6	138	31.7	65	134.4	1.13	4.83	1.08
173	2013.2.14	2019.6.10	76	male	38	non-diabetes	DC	non-HCC	-2.51439	12	17	11	59.7366	0.20453	2	2	2	2	2	0.20453	0.14136	11	11	20	34	84	67	20.1	54	39.7	74.6	140.9	1.39	2.64	36.61
174	2018.8.28	2021.3.15	31	female	66	non-diabetes	DC	non-HCC	-1.89642	16	17	16	64.5208	0.36059	2	3	2	3	3	0.36059	0.39228	11	11	21	39	109	96	35	92	34.3	58.1	148.4	1.19	3.25	7.7
175	2018.8.1	2021.8.30	37	male	56	non-diabetes	DC	non-HCC	-1.43248	16	21	17	72.9344	0.32028	2	3	3	3	3	0.32028	0.2838	15	15	25	36	67	34	47.9	19	29.9	77.3	142.2	1.57	2.77	4.8
176	2018.9.30	2021.9.2	35	female	45	non-diabetes	DC	non-HCC	-1.67343	11	13	12	58.9489	0.22939	2	2	2	2	2	0.22939	0.18809	13	13	97	106	138	57	27.8	59	30.9	61.8	139.3	1.47	2.81	9.62
177	2018.12.22	2021.8.15	32	female	75	non-diabetes	DC	non-HCC	-1.0645	16	19	19	73.6563	0.20226	3	3	3	3	3	0.20226	0.50035	21	21	201	318	195	70	107.6	51	28.3	66.3	140.9	1.94	3.3	209.55
178	2018.11.5	2020.10.15	23	male	69	non-diabetes	DC	non-HCC	-2.39048	18	20	16	68.8055	0.47209	2	3	3	3	3	0.47209	0.42767	7	7	16	20	68	16	13.5	112	36.9	73.7	141.1	1.08	3.18	4.47
179	2014.11.28	2021.7.4	79	female	41	diabetes	DC	non-HCC	-1.92344	12	13	11	56.85	0.10381	2	2	2	2	2	0.10381	0.16008	15	15	29	36	170	16	63	54	36.6	45.2	139	1.37	2.55	5.88
180	2018.7.10	2021.1.13	30	female	60	non-diabetes	DC	non-HCC	-2.67149	16	8	11	50.0182	0.17013	1	3	1	2	2	0.17013	0.32508	6	6	11	23	131	27	12.7	233	40	58.1	142.3	0.98	4.05	4.01
181	2017.5.22	2021.6.23	49	male	39	non-diabetes	DC	non-HCC	-1.77722	12	14	10	54.0077	0.06382	2	2	2	2	2	0.06382	0.14739	12	12	24	34	57	24	34	180	32.8	106.4	138.9	1.08	6.45	1.51
182	2014.1.26	2021.6.20	89	female	58	diabetes	DC	non-HCC	-2.67646	15	12	12	52.304	0.23284	1	3	2	2	2	0.23284	0.30405	9	9	25	33	150	32	8	187	38.5	68.4	142.4	1.23	8.39	4.3
183	2013.11.25	2018.1.3	49	male	41	non-diabetes	DC	non-HCC	-2.02797	13	19	13	64.2964	0.2175	2	2	3	3	3	0.2175	0.16008	13	13	47	79	220	80	33.5	28	35.7	75.8	141.3	1.46	2.12	2.06
184	2019.11.6	2021.5.24	19	male	68	non-diabetes	DC	non-HCC	-1.60786	18	23	18	72.6352	0.24241	2	3	3	3	3	0.24241	0.41577	16	16	53	54	189	70	67.1	87	33.1	60.1	141.7	1.5	3.65	26.06
185	2017.11.6	2021.9.8	46	female	64	non-diabetes	DC	non-HCC	-1.33189	16	17	17	67.5741	0.38843	3	3	2	3	3	0.38843	0.36927	15	15	21	28	147	24	36.5	62	27.8	72.4	142.1	1.67	4.1	3.88
186	2013.11.21	2019.3.8	63	female	53	diabetes	DC	non-HCC	-1.91232	15	15	14	62.3703	0.37549	2	3	2	3	3	0.37549	0.25501	8	8	31	49	61	25	20	45	32.6	69.3	142	1.14	3.9	1.41
187	2011.4.27	2021.8.22	124	female	60	non-diabetes	DC	non-HCC	-1.72073	16	8	14	54.4621	0.21019	2	3	1	3	2	0.21019	0.32508	7	7	26	54	134	24	8.6	213	27.5	72.5	145.6	1.03	4.68	3.21
188	2014.9.15	2019.9.2	60	male	52	non-diabetes	DC	non-HCC	-2.9921	16	21	14	62.6526	0.33508	1	3	3	3	3	0.33508	0.24585	8	8	15	18	102	70	15.3	72	44.4	100.5	142.2	1.03	2.23	2.12
189	2013.11.24	2019.9.18	70	male	50	non-diabetes	DC	non-HCC	-3.17822	16	21	14	60.5582	0.28323	1	3	3	3	3	0.28323	0.22821	9	9	21	25	58	29	17.8	82	47.1	102.1	142.4	1.08	5.57	2.76
190	2013.7.8	2021.4.12	93	female	56	non-diabetes	DC	non-HCC	-2.13666	14	12	12	58.2559	0.20488	2	3	2	2	2	0.20488	0.2838	11	11	33	46	108	46	39.1	113	37.5	79.4	136.8	1.13	7.31	5.19
191	2018.9.17	2019.4.18	7	male	57	diabetes	DC	HCC	-2.44081	17	18	13	63.0901	0.24162	2	3	3	3	3	0.24162	0.29382	10	10	27	27	147	120	28.4	122	40	95	143	1.09	5.25	2.64
192	2018.6.26	2021.5.9	35	female	70	diabetes	DC	HCC	-2.20829	17	19	17	67.0956	0.37024	2	3	3	3	3	0.37024	0.43966	13	13	23	46	97	126	53.5	63	39.4	51.4		1.23	1.61	5.32
193	2018.7.20	2020.12.28	29	male	63	non-diabetes	DC	HCC	-0.637285	18	23	19	76.7373	0.11797	3	3	3	3	3	0.11797	0.35798	19	24.406	25	47	74	17	111.7	43	23.4	69.1	131.6	1.63	7.6	4.65
194	2019.3.7	2020.5.5	14	male	64	diabetes	DC	HCC	-3.03346	19	23	16	67.7315	0.4879	1	3	3	3	3	0.4879	0.36927	9	9	55	42	112	152	16.3	67	45.1	114.5	140.5	0.96	4.69	17.97
195	2012.6.14	2020.7.25	97	male	54	diabetes	DC	HCC	-1.32392	17	21	17	71.1883	0.20201	3	3	3	3	3	0.20201	0.26439	15	15	141	123	93	63	64	38	29.6	60.1	136.7	1.41	2.04	49.35
196	2012.12.25	2020.6.14	90	male	58	non-diabetes	DC	HCC	-1.91448	16	21	16	67.7796	0.39197	2	3	3	3	3	0.39197	0.30405	8	8	50	52	82	68	13.5	84	31.3	67.8	140.2	1.17	4.53	64.91
197	2014.8.10	2016.10.17	26	female	55	non-diabetes	DC	HCC	-1.13388	14	15	15	66.3896	0.40111	3	3	2	3	3	0.40111	0.27399	13	13	50	45	213	81	23.6	35	24	54.3	141.2	1.68	2.97
198	2018.10.9	2020.7.20	21	male	66	diabetes	DC	HCC	-2.65493	19	20	14	62.7328	0.2954	1	3	3	3	3	0.2954	0.39228	9	9	21	21	71	33	18.1	171	41	75.1	140.4	1.27	3.27	3.65
199	2014.1.31	2018.12.15	58	male	45	diabetes	DC	HCC	-1.18152	14	19	15	66.7087	0.2392	3	3	3	3	3	0.2392	0.18809	15	15	14	25	42	17	26.1	57	24.9	74.1	138.9	1.81	4.63
200	2015.6.11	2018.11.29	41	male	54	diabetes	DC	HCC	-2.83706	17	18	13	60.0421	0.26938	1	3	3	3	3	0.26938	0.26439	7	7	38	22	81	59	11.8	130	41.7	92.6	141.7	1.04	4.94	3.22
201	2014.4.14	2018.11.29	56	male	49	non-diabetes	DC	HCC	-3.21348	13	19	12	59.6312	0.27779	1	2	3	2	2	0.27779	0.21973	16	16	14	35	124	76	14.4	88	46.8	228	142	1.01	3.24	2.42
202	2015.5.12	2016.9	16	male	66	non-diabetes	DC	HCC	-2.43854	18	23	17	68.5139	0.43789	2	3	3	3	3	0.43789	0.39228	7	7	30	36	76	98	18.9	96	38.6	93.1	143.2	0.98	4.09	3.2
203	2013.7.15	20150323	20	female	53	non-diabetes	DC	HCC	-2.82313	14	15	12	58.3947	0.37265	1	3	2	2	2	0.37265	0.25501	6	6	14	21	110	12	14.8	60	42.3	77.3	139	1	2	6.38
204	2018.7.2	2020.10.27	27	female	78	non-diabetes	DC	HCC	-1.65015	16	19	18	70.9406	0.5915	2	3	3	3	3	0.5915	0.53688	9	9	16	32	49	18	24.5	81	30.2	82.4	144.9	1.08	2.86	7.56
205	2015.12.31	2017.2.16	14	male	60	non-diabetes	DC	HCC	-2.00337	18	20	17	64.918	0.26968	2	3	3	3	3	0.26968	0.32508	10	10	57	32	147	135	24.1	134	34.3	92.5	142.7	1.13	4.14	3.9
206	2018.7.20	2020.6.9	23	male	55	non-diabetes	DC	HCC	-1.46462	16	21	16	71.679	0.24741	2	3	3	3	3	0.24741	0.27399	13	13	123	161	152	163	57.6	30	30.9	80.2	137.9	1.21	3.88	28.99
207	2014.4.3	2014.11.26	7	male	54	non-diabetes	DC	HCC	-2.08012	16	21	15	69.6787	0.31572	2	3	3	3	3	0.31572	0.26439	16	16	89	88	91	86	42.3	24	37.1	85.8	142.1	1.67	2.9	27.02
208	2016.7.16	2017.9.1	14	male	49	diabetes	DC	HCC	-1.61486	14	19	14	65.7743	0.24717	2	3	3	3	3	0.24717	0.21973	11	11	44	83	49	53	26.9	74	30.1	88	141.4	1.29	11.18	2.89
209	2013.3.8	2018.9.25	66	male	74	non-diabetes	DC	HCC	-3.1435	18	25	18	70.4206	0.59337	1	3	3	3	3	0.59337	0.48816	7	7	45	50	62	51	14.5	82	46	93.3	143.3	0.99	4.78	2.08
210	2018.6.7	2019.3.29	10	male	62	diabetes	DC	HCC	-1.87405	19	23	18	69.1297	0.39286	2	3	3	3	3	0.39286	0.34685	8	8	29	55	147	135	20.3	90	32.2	93.5	141.6	1.07	2.99	27.5
211	2013.10.10	2018.3.7	53	male	42	non-diabetes	DC	HCC	-2.06372	13	19	14	62.7584	0.24537	2	2	3	3	3	0.24537	0.16675	9	9	106	90	180	216	18.4	55	34.1	78.6	143	1.23	2.52	84.83
212	2017.12.8	2019.7.19	19	female	71	non-diabetes	DC	HCC	-2.98172	16	19	16	64.9206	0.57205	1	3	3	3	3	0.57205	0.45171	9	9	23	27	143	12	18.4	64	44.9	93.5	140.3	1.2	2.88	12.92
213	2013.8.29	2015.12.25	28	male	65	non-diabetes	DC	HCC	-0.756117	18	20	18	71.2056	0.12831	3	3	3	3	3	0.12831	0.38071	16	16	122	130	82	182	78.3	131	23.6	74.3	140	1.46	5.36	127.18
214	2019.9.17	2020.7.21	10	male	57	non-diabetes	DC	HCC	-2.14272	16	21	15	72.1157	0.43615	2	3	3	3	3	0.43615	0.29382	11	11	53	79	76	26	34	3	37.1	53.7	140.8	1.23	2.35	60.92
215	2018.12.5	2019.12.3	12	male	68	non-diabetes	DC	HCC	-2.81746	18	23	16	68.5011	0.48932	1	3	3	3	3	0.48932	0.41577	9	9	53	45	73	66	16.5	90	42.6	82.4	136.7	1.27	4.35	5.45
216	2013.7.1	2019.7.28	73	female	62	non-diabetes	DC	HCC	-2.76668	16	8	9	49.3703	0.16101	1	3	1	2	1	0.16101	0.34685	6	6	24	29	82	19	13.8	250	41.4	68.2	141.9	0.97	8.66	7.92
217	2019.4.12	2021.4.28	24	male	55	diabetes	DC	HCC	-2.87286	17	21	14	63.1755	0.28406	1	3	3	3	3	0.28406	0.27399	8	8	65	53	210	418	26.9	88	44.9	82.7	140.6	0.98	10.89	3.15
218	2015.7.16	2020.7.24	60	female	61	diabetes	DC	HCC	-2.56631	17	17	14	62.6146	0.41875	2	3	2	3	3	0.41875	0.33588	12	12	17	45	121	20	25.4	58	41.1	109.3	141.1	1.22	6.51	1.8
219	2017.4.1	2019.1.29	21	male	51	diabetes	DC	HCC	-1.38542	17	18	16	65.4367	0.27988	3	3	3	3	3	0.27988	0.23691	15	15	20	18	20	18	13.2	102	25	108.5	135.3	1.81	8.37	0.98
220	2010.9.26	2018.8.30	95	male	41	non-diabetes	DC	HCC	-1.49871	13	19	14	64.3237	0.10862	2	2	3	3	3	0.10862	0.16008	15	15	200	236	232	91	61.1	53	31.5	58.7	140.5	1.34	3.7	583.72
221	2013.9.7	2015.12.28	28	female	57	non-diabetes	DC	HCC	-1.58793	14	15	14	66.5389	0.40394	2	3	2	3	3	0.40394	0.29382	14	14	39	38	109	33	32.3	23	30.4	48	143.6	1.6	3.08	14.94
222	2013.11.23	2018.7.17	56	male	51	diabetes	DC	HCC	-2.31188	17	21	15	66.7589	0.29635	2	3	3	3	3	0.29635	0.23691	12	12	26	31	175	48	34.1	38	39.1	80.7	139.4	1.31	2.75	10.58
223	2014.7.28	2016.10.27	27	female	58	non-diabetes	DC	HCC	-1.60728	14	15	14	64.7157	0.34862	2	3	2	3	3	0.34862	0.30405	12	12	28	44	141	40	33	55	30.7	55.8	142.2	1.36	2.69	3.56
224	2018.8.6	2021.3.8	31	male	67	non-diabetes	DC	HCC	-2.16865	18	23	17	72.5054	0.50434	2	3	3	3	3	0.50434	0.40397	9	9	28	37	164	172	24.5	56	36.3	66.2	142.6	1.12	4.91	20.9
225	2013.10.28	2015.5.5	18	female	62	non-diabetes	DC	HCC	-1.5396	16	17	17	67.9146	0.44338	2	3	2	3	3	0.44338	0.34685	12	12	23	36	44	23	32	35	29.8	65.8	144.4	1.36	3.5	3.65
226	2011.5.5	2019.6.4	96	female	51	non-diabetes	DC	HCC	-3.30218	14	15	12	55.6869	0.34435	1	3	2	2	2	0.34435	0.23691	9	9	42	49	170	35	13.8	65	47.7	78.9	145.9	1.22	2.57	4.28
227	2014.6.10	2015.8.10	14	male	54	non-diabetes	DC	HCC	-2.75811	16	21	14	67.2722	0.46058	1	3	3	3	3	0.46058	0.26439	9	9	25	18	89	106	13.4	27	41.2	87.5	141	1.21	2.86	3.2
228	2013.4.6	2016.12.12	44	female	66	non-diabetes	DC	HCC	-1.88502	16	17	16	66.7921	0.54268	2	3	2	3	3	0.54268	0.39228	11	11	20	32	47	22	14.1	59	31.1	40.1	137.7	1.5	2.59	11.68
229	2012.12.27	2016.8.8	44	male	63	non-diabetes	DC	HCC	-1.76694	18	23	18	70.5611	0.3675	2	3	3	3	3	0.3675	0.35798	11	11	73	88	128	107	31.3	80	32.4	73.6	137.3	1.26	2.4	35.31
